# Supplementary material for: Rhodopsin Molecular Evolution in Mammals Inhabiting Low Light Environments
Source: PubMed Central journal article supplement (PMC2790605; doi:10.1371/journal.pone.0008326), 2009-12-16
Supplement: pone.0008326.s001.pdf [file pone.0008326.s001.pdf]

|                                      |   |   |   |   |   |   |   |   |   |   |   |   |   |   |   |   |   |   |   |   |   |   |   |   |   |   |   |   |   |
|--------------------------------------|---|---|---|---|---|---|---|---|---|---|---|---|---|---|---|---|---|---|---|---|---|---|---|---|---|---|---|---|---|
|                                      | 1 | 1 | 1 | 2 | 4 | 4 | 5 | 8 | 8 | 8 | 9 | 0 | 0 | 0 | 1 | 2 | 3 | 5 | 5 | 5 | 5 | 5 | 5 | 5 | 6 | 6 | 6 | 7 |   |
|                                      | 1 | 6 | 9 | 6 | 6 | 9 | 4 | 3 | 8 | 9 | 9 | 2 | 4 | 7 | 2 | 3 | 7 | 4 | 5 | 7 | 8 | 9 | 2 | 5 | 9 | 3 |   |   |   |
| <i>Hipposideros larvatus</i>         | V | K | V | Y | L | V | I | D | F | G | L | Y | I | P | L | I | V | I | M | L | A | F | V | L | A | A |   |   |   |
| <i>Hipposideros pratti</i>           | . | . | . | . | . | . | . | . | . | . | . | . | . | . | . | . | . | . | . | . | . | . | . | . | . | . | . | . | . |
| <i>Rhinolophus pusillus</i>          | . | . | . | . | . | . | . | . | . | . | . | F | . | . | . | V | . | . | . | . | . | S | . | . | V | . | . | . |   |
| <i>Rhinolophus ferrumequinum</i>     | . | . | . | . | . | . | . | . | . | . | . | F | . | . | . | V | . | . | . | . | . | S | . | . | . | . | . | . |   |
| <i>Megaderma spasma</i>              | . | . | . | . | . | . | . | . | . | . | . | . | V | . | . | . | . | . | . | V | . | . | . | . | . | . | . | . |   |
| <i>Eonycteris spelaea</i>            | . | . | . | . | . | . | . | . | . | . | . | . | V | . | . | . | . | . | . | . | . | L | . | . | . | . | V | . |   |
| <i>Rousettus leschenaultii</i>       | . | . | . | . | . | . | . | . | . | . | . | . | V | . | . | . | . | . | . | . | . | L | . | . | . | . | V | . |   |
| <i>Nyctimene cephalotes</i>          | . | . | . | H | . | . | . | . | . | . | . | . | V | . | . | . | . | . | . | . | . | L | . | . | . | . | V | . |   |
| <i>Dobsonia viridis</i>              | . | . | . | H | . | . | . | . | . | . | . | . | V | . | . | . | . | . | . | . | . | L | . | . | . | . | V | . |   |
| <i>Cynopterus brachyotis</i>         | . | . | . | H | . | . | . | . | . | . | . | . | V | . | . | . | . | . | . | . | . | L | . | . | . | . | V | . |   |
| <i>Myotis ricketti</i>               | . | . | . | . | . | V | N | . | . | . | M | . | V | A | . | . | . | . | . | . | . | . | . | . | . | . | . | . |   |
| <i>Taphozous melanopogon</i>         | . | . | . | . | . | . | . | . | . | . | M | . | V | . | . | . | . | . | . | V | . | . | . | . | . | . | . | . |   |
| <i>Miniopterus fuliginosus</i>       | . | . | . | . | . | . | . | . | . | . | . | . | . | . | . | . | . | . | . | . | . | . | . | . | . | . | . | . |   |
| <i>Chaerephon plicatus</i>           | . | . | . | H | . | . | . | . | . | . | . | . | V | . | . | V | . | . | . | . | . | . | . | . | . | . | . | . |   |
| <i>Artibeus jamaicensis</i>          | . | . | . | . | . | . | . | . | . | . | . | . | V | . | . | . | . | . | . | . | V | C | I | . | . | . | . | . |   |
| <i>Macroscelides proboscideus</i>    | I | . | . | . | M | . | . | . | L | . | . | . | V | . | V | . | . | . | V | . | . | I | M | . | . | . | . | . |   |
| <i>Amblysomus hottentotus</i>        | . | Q | . | . | . | . | . | . | L | . | . | . | V | . | . | . | . | . | . | . | . | . | . | . | . | . | . | . |   |
| <i>Bathyergus suillus</i>            | . | I | . | . | . | . | . | . | I | C | M | . | . | . | M | . | . | . | V | . | L | . | . | . | . | . | . | . |   |
| <i>Cryptomys damarensis</i>          | . | I | . | . | . | . | . | N | I | C | M | . | V | . | M | . | M | V | . | V | . | . | . | . | . | . | . | . |   |
| <i>Heliophobius argenteocinereus</i> | . | I | . | . | M | V | N | I | C | M | . | V | . | M | . | . | . | . | V | . | T | . | . | . | . | . | . | . |   |
| <i>Heterocephalus glaber</i>         | . | I | M | . | . | . | V | . | I | C | M | . | V | A | M | . | M | . | V | V | . | . | . | . | . | . | . | . |   |
| <i>Thryonomys swinderianus</i>       | . | A | . | . | . | . | . | . | . | . | . | . | V | . | . | . | . | . | . | V | . | . | . | . | . | . | . | . | . |

|                                      |   |   |   |   |   |   |   |   |   |   |   |   |   |   |   |   |   |   |   |   |   |   |   |   |   |   |   |   |   |
|--------------------------------------|---|---|---|---|---|---|---|---|---|---|---|---|---|---|---|---|---|---|---|---|---|---|---|---|---|---|---|---|---|
|                                      | 1 | 1 | 1 | 1 | 2 | 2 | 2 | 2 | 2 | 2 | 2 | 2 | 2 | 2 | 2 | 2 | 2 | 2 | 2 | 2 | 3 | 3 | 3 | 3 | 3 | 3 |   |   |   |
|                                      | 9 | 9 | 9 | 9 | 1 | 1 | 1 | 5 | 5 | 6 | 6 | 7 | 7 | 7 | 8 | 8 | 9 | 9 | 9 | 9 | 9 | 2 | 2 | 2 | 2 | 3 | 3 |   |   |
|                                      | 4 | 7 | 8 | 9 | 6 | 7 | 8 | 6 | 9 | 3 | 6 | 0 | 3 | 7 | 2 | 6 | 0 | 2 | 7 | 8 | 9 | 1 | 6 | 7 | 8 | 7 |   |   |   |
| <i>Hipposideros larvatus</i>         | L | E | V | N | M | I | V | I | I | I | L | S | F | T | N | I | L | A | S | S | S | L | S | P | L | A |   |   |   |
| <i>Hipposideros pratti</i>           | . | . | . | . | . | . | . | . | . | . | . | . | . | . | . | . | . | . | . | . | . | . | . | . | . | . | . | . | . |
| <i>Rhinolophus pusillus</i>          | . | . | . | . | . | . | . | . | . | . | . | . | . | . | . | . | . | . | A | . | . | N | . | . | . | . | . | . |   |
| <i>Rhinolophus ferrumequinum</i>     | . | . | . | . | . | . | . | . | . | . | . | . | . | . | . | . | . | . | A | . | . | N | . | . | . | . | . | . |   |
| <i>Megaderma spasma</i>              | . | . | . | . | . | . | . | . | . | . | V | . | . | . | . | . | . | . | . | . | . | N | I | . | . | . | . | . |   |
| <i>Eonycteris spelaea</i>            | . | . | . | . | . | . | . | . | . | . | G | . | . | . | . | . | . | . | . | . | . | N | . | . | . | . | . | . |   |
| <i>Rousettus leschenaultii</i>       | . | . | . | . | . | . | . | . | . | . | G | . | . | . | . | . | . | . | . | . | . | N | . | . | . | . | . | . |   |
| <i>Nyctimene cephalotes</i>          | . | . | . | . | . | . | . | . | . | . | G | . | . | . | . | . | . | . | . | . | . | N | . | . | . | . | . | . |   |
| <i>Dobsonia viridis</i>              | . | . | . | . | . | . | . | . | . | . | G | . | . | . | . | . | . | T | . | . | . | N | . | . | . | . | . | . |   |
| <i>Cynopterus brachyotis</i>         | . | . | . | . | . | . | . | . | . | . | G | . | . | . | . | . | . | . | . | . | . | N | . | . | . | . | . | . |   |
| <i>Myotis ricketti</i>               | . | . | . | . | . | . | V | . | . | . | . | . | . | . | V | I | . | . | . | A | . | N | . | . | . | . | . | . |   |
| <i>Taphozous melanopogon</i>         | . | . | . | . | . | . | . | . | . | . | V | G | . | . | . | . | . | . | . | . | . | N | . | . | . | . | . | . |   |
| <i>Miniopterus fuliginosus</i>       | . | . | . | . | . | . | . | . | . | . | . | . | . | . | . | . | . | . | . | . | . | N | . | . | . | . | . | . |   |
| <i>Chaerephon plicatus</i>           | . | . | . | . | V | . | . | . | . | . | . | . | S | D | . | . | . | . | . | . | . | N | . | . | . | . | . | . |   |
| <i>Artibeus jamaicensis</i>          | . | . | . | . | . | . | . | . | . | . | . | . | . | . | . | . | . | . | . | . | . | N | . | . | . | . | . | . |   |
| <i>Macroscelides proboscideus</i>    | . | . | . | . | L | V | I | . | . | . | V | . | I | . | . | . | I | . | . | . | N | . | . | F | V | . | . | . |   |
| <i>Amblysomus hottentotus</i>        | . | D | I | S | . | V | . | L | . | V | . | G | L | . | . | . | . | . | A | . | I | . | L | F | V | . | . | . |   |
| <i>Bathyergus suillus</i>            | P | . | I | . | L | V | I | . | . | . | V | . | V | . | D | . | I | . | . | . | I | N | . | . | . | . | . | . |   |
| <i>Cryptomys damarensis</i>          | P | . | I | . | L | V | I | . | . | . | V | . | V | . | D | . | I | . | . | . | I | N | . | . | . | . | . | . |   |
| <i>Heliophobius argenteocinereus</i> | P | . | I | . | L | V | I | . | . | . | V | . | V | . | D | . | I | S | . | . | . | I | N | . | . | . | . | . |   |
| <i>Heterocephalus glaber</i>         | P | . | I | . | L | V | I | . | . | . | V | . | M | . | D | . | I | . | . | . | I | . | . | . | . | . | . | . |   |
| <i>Thryonomys swinderianus</i>       | . | . | . | . | . | . | I | . | . | . | V | . | M | . | . | . | . | . | A | . | I | N | . | . | . | . | . | . | . |
