# Supplementary material for: Rhodopsin Molecular Evolution in Mammals Inhabiting Low Light Environments
Source: PubMed Central journal article supplement (PMC2790605; doi:10.1371/journal.pone.0008326), 2009-12-16

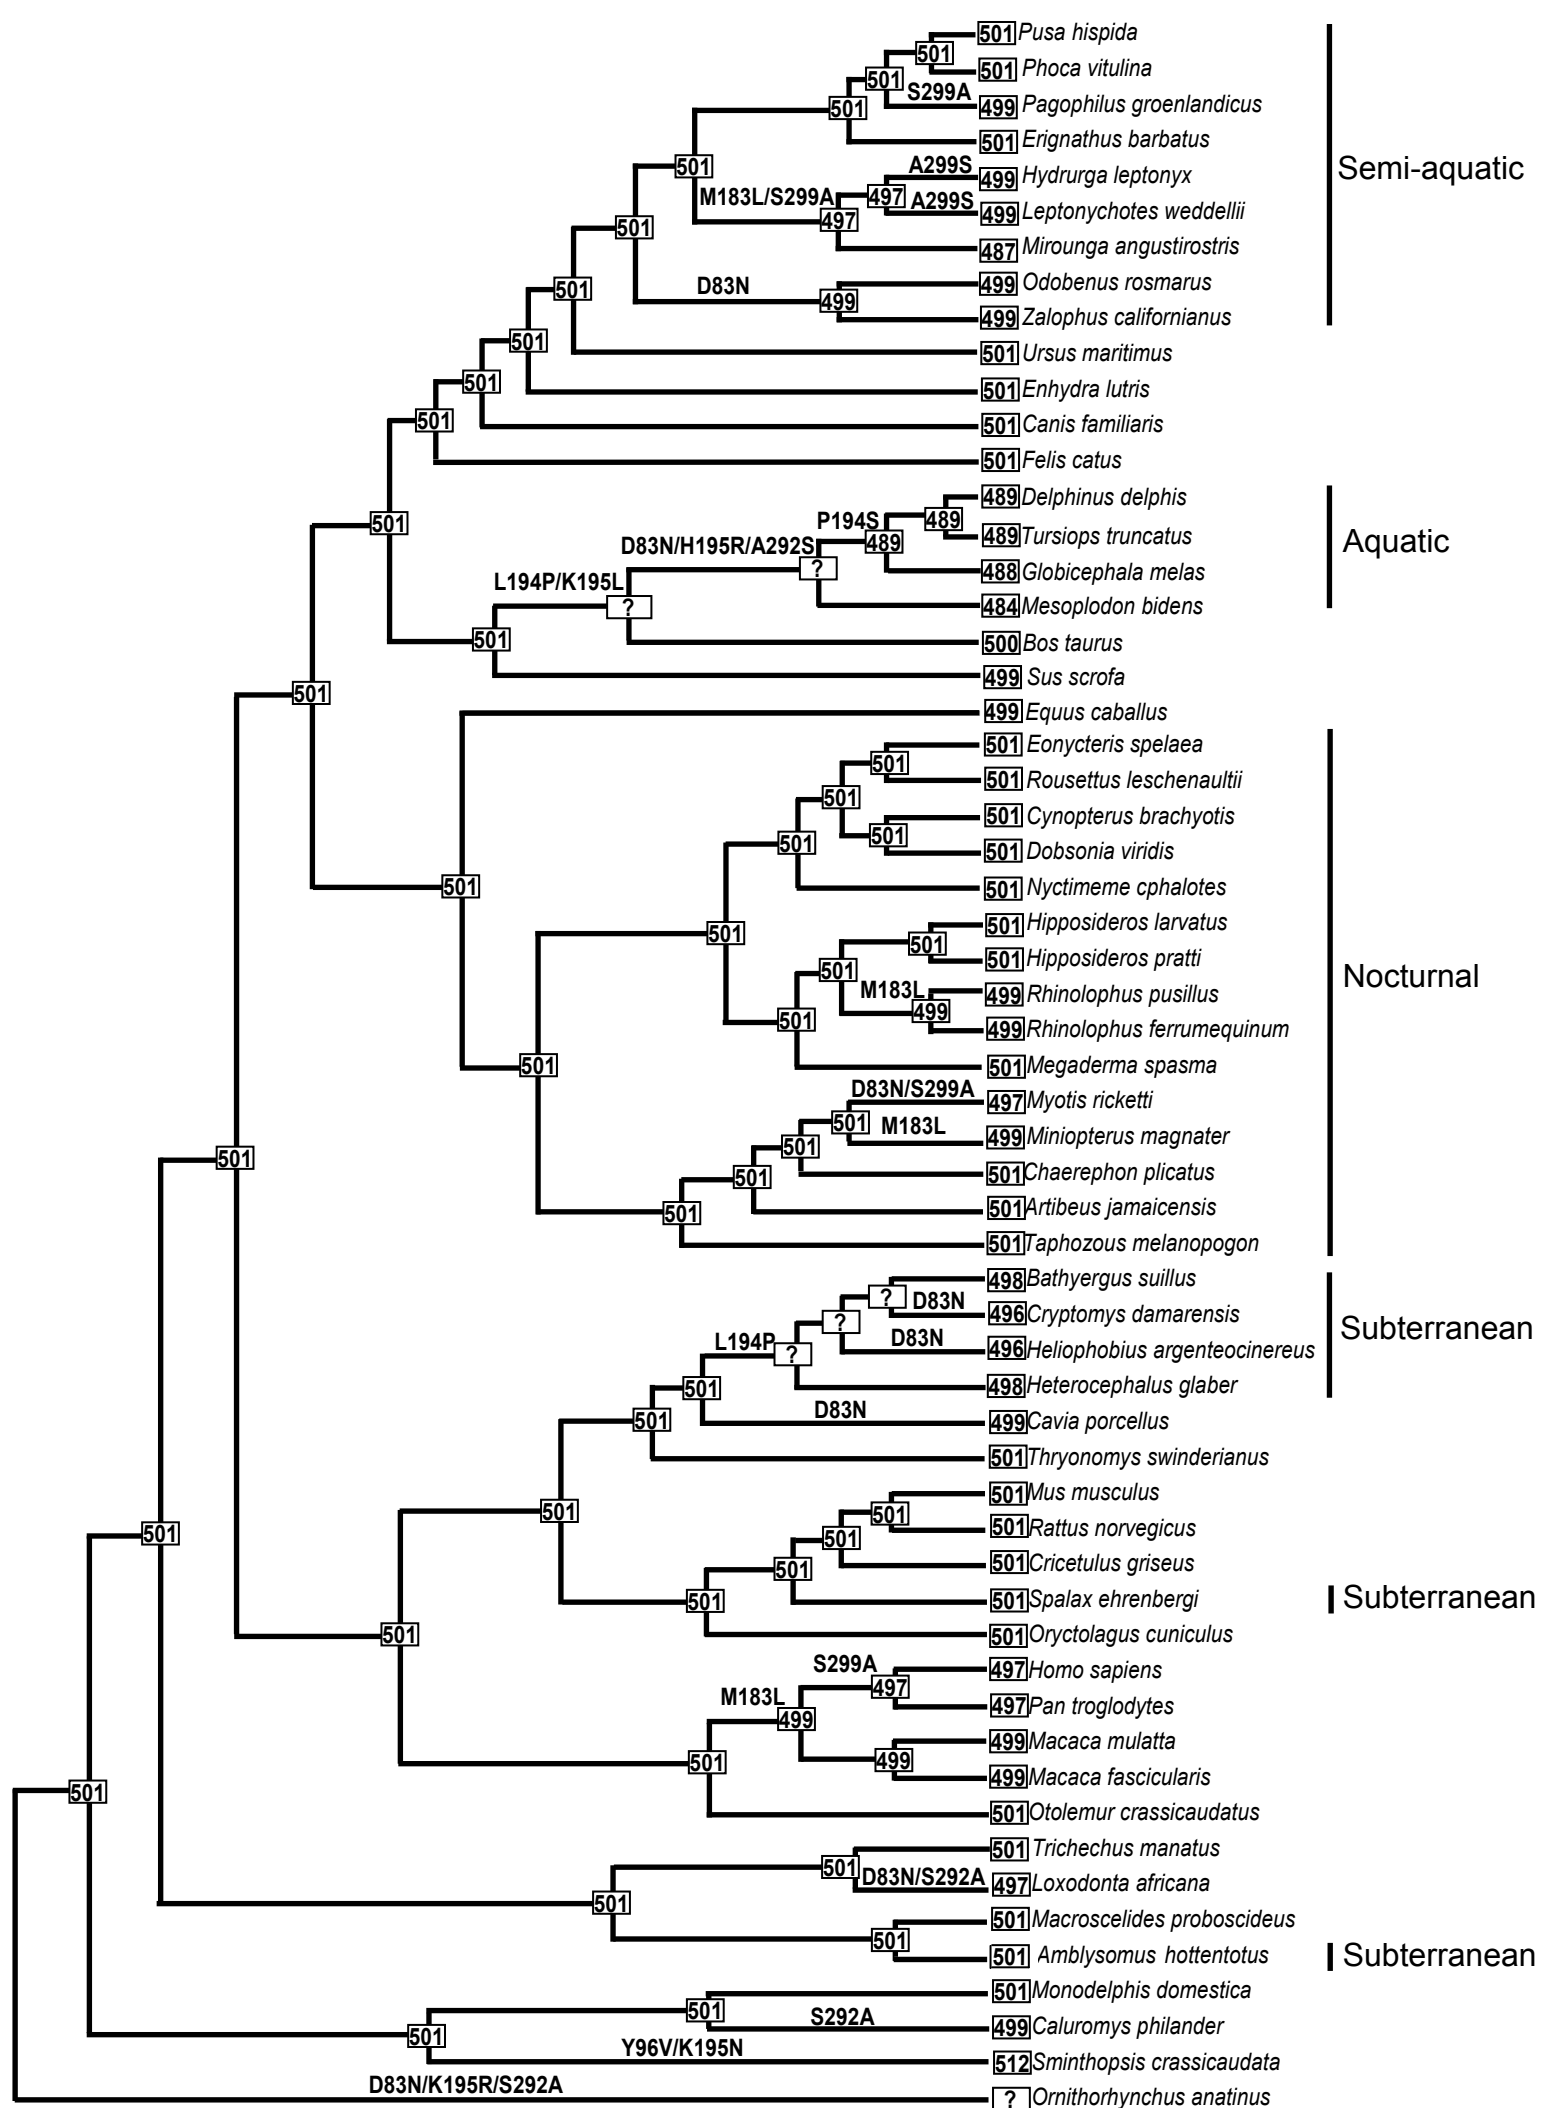

Supplement: pone.0008326.s002.pdf [file pone.0008326.s002.pdf]
