# Supplementary material for: Rhodopsin Molecular Evolution in Mammals Inhabiting Low Light Environments
Source: PubMed Central journal article supplement (PMC2790605; doi:10.1371/journal.pone.0008326), 2009-12-16
Supplement: pone.0008326.s003.pdf [file pone.0008326.s003.pdf]

Supplementary Table S1. Classification of taxa and GenBank accession numbers for rhodopsin gene in this study. Accession numbers of new sequences are shown in bold.

| Classification        |                             | Common name                    | Species name                    | Acc. No                          |                  |
|-----------------------|-----------------------------|--------------------------------|---------------------------------|----------------------------------|------------------|
| Boreoeutheria         | Laurasiatheria              | ORDER CHIROPTERA (BATS)        |                                 |                                  |                  |
|                       |                             | SUBORDER YINPTEROCHIROPTERA    |                                 |                                  |                  |
|                       |                             | Family Pteropodidae            | lesser dawn bat                 | <i>Eonycteris spelaea</i>        | <b>GQ290305</b>  |
|                       |                             |                                | Leschenault's rousette          | <i>Rousettus leschenaultii</i>   | <b>GQ290317</b>  |
|                       |                             |                                | Pallas's tube-nosed fruit bat   | <i>Nyctimene cephalotes</i>      | <b>GQ290313</b>  |
|                       |                             |                                | greenish naked-backed fruit bat | <i>Dobsonia viridis</i>          | <b>GQ290304</b>  |
|                       |                             |                                | lesser short-nosed fruit bat    | <i>Cynopterus brachyotis</i>     | <b>GQ290303</b>  |
|                       |                             | Family Megadermatidae          | lesser false vampire bat        | <i>Megaderma spasma</i>          | <b>GQ290316</b>  |
|                       |                             | Family Rhinolophidae           | least horseshoe bat             | <i>Rhinolophus pusillus</i>      | <b>GQ290315</b>  |
|                       |                             |                                | greater horseshoe bat           | <i>Rhinolophus ferrumequinum</i> | <b>GQ290314</b>  |
|                       |                             |                                | Pratt's leaf-nosed bat          | <i>Hipposideros pratti</i>       | <b>GQ290309</b>  |
|                       |                             |                                | intermediate leaf-nosed bat     | <i>Hipposideros larvatus</i>     | <b>GQ290308</b>  |
|                       |                             | SUBORDER YANGOCHIROPTERA       |                                 |                                  |                  |
|                       |                             | Family Emballonuridae          | black-bearded tomb bat          | <i>Taphozous melanopogon</i>     | <b>GQ290318</b>  |
|                       |                             | Family Phyllostomidae          | Jamaican fruit-eating bat       | <i>Artibeus jamaicensis</i>      | <b>GQ290299</b>  |
|                       |                             | Family Miniopteridae           | western long-fingered bat       | <i>Miniopterus fuliginosus</i>   | <b>GQ290311</b>  |
|                       |                             | Family Molossidae              | wrinkle-lipped free-tailed bat  | <i>Chaerephon plicatus</i>       | <b>GQ290301</b>  |
|                       |                             | Family Vespertilionidae        | Rickett's big-footed myotis     | <i>Myotis ricketti</i>           | <b>GQ290312</b>  |
|                       |                             | ORDER CARNIVORA                |                                 |                                  |                  |
|                       |                             | Family Canidae                 | domestic dog                    | <i>Canis lupus</i>               | X71380           |
|                       |                             | Family Felidae                 | domestic cat                    | <i>Felis catus</i>               | NM_001009<br>242 |
|                       |                             | Family Phocidae                | harp seal                       | <i>Pagophilus groenlandicus</i>  | AF055318         |
|                       |                             |                                | harbor seal                     | <i>Phoca vitulina</i>            | AF055317         |
|                       |                             |                                | ringed seal                     | <i>Pusa hispida</i>              | AY883927         |
|                       |                             |                                | bearded seal                    | <i>Erignathus barbatus</i>       | AY883932         |
|                       |                             |                                | leopard seal                    | <i>Hydrurga leptonyx</i>         | AY883930         |
|                       |                             |                                | Weddell seal                    | <i>Leptonychotes weddellii</i>   | AY883929         |
|                       | Northern elephant seal      | <i>Mirounga angustirostris</i> | AY883928                        |                                  |                  |
| Family Odobenidae     | walrus                      | <i>Odobenus rosmarus</i>       | AY883925                        |                                  |                  |
| Family Otariidae      | California sealion          | <i>Zalophus californianus</i>  | AY883924                        |                                  |                  |
| Family Mustelidae     | sea otter                   | <i>Enhydra lutris</i>          | AY883931                        |                                  |                  |
| Family Ursidae        | polar bear                  | <i>Ursus maritimus</i>         | AY883926                        |                                  |                  |
| ORDER PERISSODACTYLA  |                             |                                |                                 |                                  |                  |
| Family Equidae        | horse                       | <i>Equus caballus</i>          | XM_001490<br>301                |                                  |                  |
| ORDER CETARTIODACTYLA |                             |                                |                                 |                                  |                  |
| Family Bovidae        | cow                         | <i>Bos taurus</i>              | NM_001014<br>890                |                                  |                  |
|                       | wild boar                   | <i>Sus scrofa</i>              | NM_214221                       |                                  |                  |
| ORDER CETACEA         |                             |                                |                                 |                                  |                  |
| Family Delphinidae    | bottlenose dolphin          | <i>Tursiops truncatus</i>      | AF055456                        |                                  |                  |
|                       | short-beaked common dolphin | <i>Delphinus delphis</i>       | AF055314                        |                                  |                  |
|                       | long-finned pilot whale     | <i>Globicephala melas</i>      | AF055315                        |                                  |                  |
| Family Ziphiidae      | Sowerby's beaked whale      | <i>Mesoplodon bidens</i>       | AF055316                        |                                  |                  |
| Euarchontoglires      | ORDER RODENTS               |                                |                                 |                                  |                  |
|                       | SUBORDER MYOMORPHA          |                                |                                 |                                  |                  |
|                       | Family Muridae              | house mouse                    | <i>Mus musculus</i>             | NM_145383                        |                  |
|                       |                             | brown rat                      | <i>Rattus norvegicus</i>        | NM_033441                        |                  |
|                       | Family Cricetidae           | striped dwarf hamster          | <i>Cricetulus barabensis</i>    | X61084                           |                  |
| Family Spalacidae     | Middle East blind mole rat  | <i>Spalax ehrenbergi</i>       | AF309568                        |                                  |                  |

Supplementary Table S1 continued

|               |            |                          |                            |                                      |                  |
|---------------|------------|--------------------------|----------------------------|--------------------------------------|------------------|
|               |            | SUBORDER HYSTRICOMORPHA  |                            |                                      |                  |
|               |            | Family Thryonomyidae     | greater cane rat           | <i>Thryonomys swinderianus</i>       | <b>GQ290319</b>  |
|               |            | Family Bathyergidae      | naked mole-rat             | <i>Heterocephalus glaber</i>         | <b>GQ290307</b>  |
|               |            |                          | silvery mole-rat           | <i>Heliophobius argenteocinereus</i> | <b>GQ290306</b>  |
|               |            |                          | Damaraland mole-rat        | <i>Cryptomys damarensis</i>          | <b>GQ290302</b>  |
|               |            |                          | cape dune mole rat         | <i>Bathyergus suillus</i>            | <b>GQ290300</b>  |
|               |            | Family Caviidae          | domesticated Guinea pig    | <i>Cavia porcellus</i>               | EF457995         |
|               |            | ORDER LAGOMORPHA         |                            |                                      |                  |
|               |            | Family Leporidae         | European rabbit            | <i>Oryctolagus cuniculus</i>         | NM_001082<br>349 |
|               |            | ORDER PRIMATES           |                            |                                      |                  |
|               |            | Family Cercopithecidae   | crab-eating macaque        | <i>Macaca fascicularis</i>           | S76579           |
|               |            |                          | rhesus monkey              | <i>Macaca mulatta</i>                | XM_001094<br>250 |
|               |            | Family Hominidae         | human                      | <i>Homo sapiens</i>                  | NM_000539        |
|               |            |                          | common chimpanzee          | <i>Pan troglodytes</i>               | XM_516740        |
|               |            | Family Galagidae         | brown greater galago       | <i>Otolemur crassicaudatus</i>       | AB112594         |
| Atlantogenata | Afrotheria | ORDER PROBOSCIDEA        |                            |                                      |                  |
|               |            | Family Elephantidae      | African bush elephant      | <i>Loxodonta africana</i>            | AY686752         |
|               |            | ORDER SIRENIA            |                            |                                      |                  |
|               |            | Family Trichechidae      | West Indian manatee        | <i>Trichechus manatus</i>            | AF055319         |
|               |            | ORDER MACROSCELIDEA      |                            |                                      |                  |
|               |            | Family Macroscelididae   | short-eared elephant shrew | <i>Macroscelides proboscideus</i>    | <b>GQ290310</b>  |
|               |            | ORDER AFROSORICIDA       |                            |                                      |                  |
|               |            | Family Chrysochloridae   | Hottentot golden mole      | <i>Amblysomus hottentotus</i>        | <b>GQ290298</b>  |
| Marsupialia   |            | ORDER DASYUROMORPHIA     |                            |                                      |                  |
|               |            | Family Dasyuridae        | fat-tailed dunnart         | <i>Sminthopsis crassicaudata</i>     | AY159786         |
|               |            | ORDER DIDELPHIMORPHIA    |                            |                                      |                  |
|               |            | Family Didelphidae       | gray short-tailed opossum  | <i>Monodelphis domestica</i>         | XM_001366<br>188 |
|               |            |                          | bare-tailed woolly opossum | <i>Caluromys philander</i>           | AY313946         |
| Prototheria   |            | ORDER MONOTREMATA        |                            |                                      |                  |
|               |            | Family Ornithorhynchidae | platypus                   | <i>Ornithorhynchus anatinus</i>      | NM_001127<br>627 |
