# Supplementary material for: Rhodopsin Molecular Evolution in Mammals Inhabiting Low Light Environments
Source: PubMed Central journal article supplement (PMC2790605; doi:10.1371/journal.pone.0008326), 2009-12-16
Supplement: pone.0008326.s004.pdf [file pone.0008326.s004.pdf]

Supplementary Table S2. Primers used in this study

| Primer name            | Primer sequence (5' to 3') <sup>1</sup>                                 | Ta (°C) | Product                 |
|------------------------|-------------------------------------------------------------------------|---------|-------------------------|
| RHFc <sup>2</sup>      | CC[G/A]CAGCC <u>ATGAA</u> [C/T]GG[G/C]AC[G/A]GA[G/A]GGCCC[G/T]AACTTCTAC | 55-60°C | Exon 1-Exon 2 (~2400bp) |
| RDaR <sup>2</sup>      | GC[G/A]CAGGCCAG[C/T]GCCATGACCCAGG                                       |         |                         |
| RDbf <sup>2</sup>      | AGGTGAAATTGCCCTGTGGTCCTTGGTGGTC                                         | 55-60°C | Exon 2-Exon 3 (~1500bp) |
| RDbR <sup>2</sup>      | GGGATGGTGAAAGTGGACCAC[G/A]AACATGTAGA                                    |         |                         |
| RDeF <sup>2</sup>      | GGCATGCAGTGCTC[A/G]TG[T/C]GGGAT[C/T]GAC                                 | 55-60°C | Exon 3-Exon 5 (~1400bp) |
| RHRc <sup>2</sup>      | GG[G/T] <u>CTTAGGC</u> [C/T]GG[T/G]GCCACCTGGCT[G/C]GTCTCCGTCTTG         |         |                         |
| G5F <sup>3</sup>       | AGCCATGAA[C/T]GG[G/C]ACAGAAG                                            | 50-55°C | Exon 1 (~370bp)         |
| G5R <sup>3</sup>       | C[A/G]GCTCATACC[G/T]CCCAGGGTG                                           |         |                         |
| H2F <sup>3</sup>       | T[G/A]CAGGTGAAAT[T/C]GCCCT[G/A]TGG                                      | 50-55°C | Exon 2 (~200bp)         |
| H1R <sup>3</sup>       | CAGTGCCATTACCTGGACCA                                                    |         |                         |
| J2F <sup>3</sup>       | TCAGGTA[C/T]AT[C/T]CC[A/G]GAAG                                          | 50-55°C | Exon 3-Exon 4 (~550bp)  |
| J2R <sup>3</sup>       | GGCACCTGCTTATTCATC                                                      |         |                         |
| K2F <sup>3</sup>       | C[T/C][C/T]TTGCCTTCCAGTTCCG                                             | 50-55°C | Exon 5 (~150bp)         |
| K1R <sup>3</sup>       | CACCTGGCT[C/G]GTCTCCGTCTTG                                              |         |                         |
| Sequencing primer pair |                                                                         |         |                         |
| M13-47 <sup>4</sup>    | CGCCAGGGTTTCCAGTCACGAC                                                  | 55°C    |                         |
| M13-48 <sup>4</sup>    | GAGCGGATAACAATTCACACAGG                                                 |         |                         |

<sup>1</sup> Start and stop codons are underlined

<sup>2</sup> Primer used in all mammals

<sup>3</sup> Primer used in Hottentot golden mole only

<sup>4</sup> Primer used in sequencing
