# Supplementary material for: Rhodopsin Molecular Evolution in Mammals Inhabiting Low Light Environments
Source: PubMed Central journal article supplement (PMC2790605; doi:10.1371/journal.pone.0008326), 2009-12-16
Supplement: pone.0008326.s005.pdf [file pone.0008326.s005.pdf]

Supplementary table S3. Likelihood values and parameter estimates for mammalian rhodopsin genes

| Model code (a)                                               | $\ell$ (b) | $P$ (c) | Parameter estimates                                                                                             |
|--------------------------------------------------------------|------------|---------|-----------------------------------------------------------------------------------------------------------------|
| <b>Dataset I: all mammals</b>                                |            |         |                                                                                                                 |
| <i>Branch Models</i>                                         |            |         |                                                                                                                 |
| A1: One-ratio                                                | -9008.20   | 118     | $\omega=0.040$                                                                                                  |
| B1: Free-ratio                                               | -8843.40   | 233     | variable $\omega$ by branch                                                                                     |
| C1: Two-ratio: AFM branch, background                        | -9006.28   | 119     | $\omega_0=0.039, \omega_1=0.104$                                                                                |
| D1: Two-ratio: Middle East blind mole rat branch, background | -9007.92   | 119     | $\omega_0=0.040, \omega_1=0.055$                                                                                |
| E1: Two-ratio: Hottentot golden mole branch, background      | -9008.20   | 119     | $\omega_0=0.040, \omega_1=0.038$                                                                                |
| F1: Two-ratio: CET branch, background                        | -9004.02   | 119     | $\omega_0=0.039, \omega_1=0.202$                                                                                |
| G1: Two-ratio: PIN branch, background                        | -9007.87   | 119     | $\omega_0=0.040, \omega_1=0.000$                                                                                |
| H1: Two-ratio: West Indian manatee branch, background        | -9005.33   | 119     | $\omega_0=0.041, \omega_1=0.009$                                                                                |
| I1: Two-ratio: sea otter branch, background                  | -9008.15   | 119     | $\omega_0=0.040, \omega_1=0.034$                                                                                |
| J1: Two-ratio: BAT branch, background                        | -9008.20   | 119     | $\omega_0=0.040, \omega_1=0.038$                                                                                |
| <i>Site Models</i>                                           |            |         |                                                                                                                 |
| K1: M1a: nearly neutral                                      | -8857.65   | 119     | $\rho_0=0.936$ ( $\rho_1=0.064$ )<br>$\omega_0=0.025$ ( $\omega_1=1.000$ )                                      |
| L1: M2a: positive selection                                  | -8857.65   | 121     | $\rho_0=0.936, \rho_1=0.064$ ( $\rho_2=0.000$ )<br>$\omega_0=0.025, \omega_1=1.000$ ( $\omega_2=75.307$ )       |
| M1: M8a: $\beta$ & $\omega=1$                                | -8663.43   | 119     | $p=0.127, q=1.984$                                                                                              |
| N1: M8: $\beta$ & $\omega$                                   | -8663.44   | 121     | $\rho_0=1.000, p=0.127, q=1.984$<br>$\rho_1=0.000, \omega=2.724$                                                |
| <i>Clade Models</i>                                          |            |         |                                                                                                                 |
| O1: Model C: all African mole-rats                           | -8676.08   | 122     | $\omega_0=0.005, \rho_0=0.816; \omega_1=1, \rho_1=0.010$<br>$\omega_2=0.199, \omega_3=0.298$ ( $\rho_2=0.174$ ) |
| P1: Model C: all pinnipeds                                   | -8658.42   | 122     | $\omega_0=0.006, \rho_0=0.820; \omega_1=1, \rho_1=0.004$<br>$\omega_2=0.197, \omega_3=1.262$ ( $\rho_2=0.177$ ) |
| Q1: Model C: all cetaceans                                   | -8660.95   | 122     | $\omega_0=0.005, \rho_0=0.811; \omega_1=1, \rho_1=0.015$<br>$\omega_2=0.180, \omega_3=1.205$ ( $\rho_2=0.174$ ) |
| R1: Model C: all bats                                        | -8668.22   | 122     | $\omega_0=0.005, \rho_0=0.815; \omega_1=1, \rho_1=0.007$<br>$\omega_2=0.236, \omega_3=0.102$ ( $\rho_2=0.178$ ) |
| <b>Dataset II: bats only</b>                                 |            |         |                                                                                                                 |
| <i>Branch Models</i>                                         |            |         |                                                                                                                 |
| A2: One-ratio                                                | -2963.02   | 29      | $\omega=0.023$                                                                                                  |
| B2: Free-ratio                                               | -2945.07   | 55      | variable $\omega$ by branch                                                                                     |
| C2: Two-ratio: OWF branch, background                        | -2962.76   | 30      | $\omega_0=0.022, \omega_1=0.035$                                                                                |
| D2: Two-ratio: HDC branch, background                        | -2961.85   | 30      | $\omega_0=0.022, \omega_1=\infty$                                                                               |
| E2: Two-ratio: YAN branch, background                        | -2960.73   | 30      | $\omega_0=0.024, \omega_1=0.001$                                                                                |
| <i>Site Models</i>                                           |            |         |                                                                                                                 |
| F2: M1a: nearly neutral                                      | -2954.28   | 30      | $\rho_0=0.978$ ( $\rho_1=0.022$ )<br>$\omega_0=0.015$ ( $\omega_1=1.000$ )                                      |
| G2: M2a: positive selection                                  | -2954.29   | 32      | $\rho_0=0.978, \rho_1=0.022$ ( $\rho_2=0.000$ )<br>$\omega_0=0.015, \omega_1=1.000$ ( $\omega_2=45.178$ )       |
| H2: M8a: $\beta$ & $\omega=1$                                | -2949.45   | 30      | $p=0.101, q=3.231$                                                                                              |
| I2: M8: $\beta$ & $\omega$                                   | -2949.45   | 32      | $\rho_0=1.000, p=0.101, q=3.231$<br>$\rho_1=0, \omega=1.000$                                                    |
| <i>Clade Models</i>                                          |            |         |                                                                                                                 |
| J2: Model C: all Old World fruit bats                        | -2948.75   | 33      | $\omega_0=0.009, \rho_0=0.936; \omega_1=1, \rho_1=0$<br>$\omega_2=0.297, \omega_3=0.267$ ( $\rho_2=0.064$ )     |
| K2: Model C: all high-duty-cycle bats                        | -2948.73   | 33      | $\omega_0=0.009, \rho_0=0.935; \omega_1=1, \rho_1=0$<br>$\omega_2=0.273, \omega_3=0.339$ ( $\rho_2=0.065$ )     |
| L2: Model C: all Yangochiroptera                             | -2948.53   | 33      | $\omega_0=0.009, \rho_0=0.944; \omega_1=1, \rho_1=0$<br>$\omega_2=0.368, \omega_3=0.263$ ( $\rho_2=0.056$ )     |

(a) Codes for focal branches (e.g. AFM) are given in fig. 1; (b) Likelihood values; (c) Number of parameters
