# Supplementary material for: Rhodopsin Molecular Evolution in Mammals Inhabiting Low Light Environments
Source: PubMed Central journal article supplement (PMC2790605; doi:10.1371/journal.pone.0008326), 2009-12-16
Supplement: pone.0008326.s006.pdf [file pone.0008326.s006.pdf]

Table S4. Summary of the 13 key amino acid sites for rhodopsins. For  $\lambda_{\max}$  values, those predicted from this study are given in bold and those from the literature are in plain text. Amino acids identical to the mammalian consensus are indicated by a point (.), n/a represents missing data.

| Species                          | 8<br>3 | 9<br>6 | 1<br>0<br>2 | 1<br>2<br>2 | 1<br>8<br>3 | 1<br>9<br>4 | 1<br>9<br>5 | 2<br>5<br>3 | 2<br>6<br>1 | 2<br>8<br>9 | 2<br>9<br>2 | 2<br>9<br>9 | 3<br>1<br>7 | $\lambda_{\max}$<br>(measured) | $\lambda_{\max}$<br>(predicted) |
|----------------------------------|--------|--------|-------------|-------------|-------------|-------------|-------------|-------------|-------------|-------------|-------------|-------------|-------------|--------------------------------|---------------------------------|
| Consensus                        | D      | Y      | Y           | E           | M           | L           | K           | M           | F           | T           | A           | S           | M           |                                |                                 |
| <i>Hipposideros larvatus</i>     | .      | .      | .           | .           | .           | .           | .           | .           | .           | .           | .           | .           | .           |                                | <b>501</b>                      |
| <i>Hipposideros pratti</i>       | .      | .      | .           | .           | .           | .           | .           | .           | .           | .           | .           | .           | .           |                                | <b>501</b>                      |
| <i>Rhinolophus pusillus</i>      | .      | .      | .           | .           | L           | .           | .           | .           | .           | .           | .           | .           | .           |                                | <b>499</b>                      |
| <i>Rhinolophus ferrumequinum</i> | .      | .      | .           | .           | L           | .           | .           | .           | .           | .           | .           | .           | .           |                                | <b>499</b>                      |
| <i>Megaderma spasma</i>          | .      | .      | .           | .           | .           | .           | .           | .           | .           | .           | .           | .           | .           |                                | <b>501</b>                      |
| <i>Eonycteris spelaea</i>        | .      | .      | .           | .           | .           | .           | .           | .           | .           | .           | .           | .           | .           |                                | <b>501</b>                      |
| <i>Rousettus leschenaultii</i>   | .      | .      | .           | .           | .           | .           | .           | .           | .           | .           | .           | .           | .           |                                | <b>501</b>                      |
| <i>Nyctimene cphalotes</i>       | .      | .      | .           | .           | .           | .           | .           | .           | .           | .           | .           | .           | .           |                                | <b>501</b>                      |
| <i>Dobsonia viridis</i>          | .      | .      | .           | .           | .           | .           | .           | .           | .           | .           | .           | .           | .           |                                | <b>501</b>                      |
| <i>Cynopterus brachyotis</i>     | .      | .      | .           | .           | .           | .           | .           | .           | .           | .           | .           | .           | .           |                                | <b>501</b>                      |
| <i>Myotis ricketti</i>           | N      | .      | .           | .           | .           | .           | .           | .           | .           | .           | .           | A           | .           |                                | <b>497</b>                      |
| <i>Taphozous melanopogon</i>     | .      | .      | .           | .           | .           | .           | .           | .           | .           | .           | .           | .           | .           |                                | <b>501</b>                      |
| <i>Miniopterus fuliginosus</i>   | .      | .      | .           | .           | L           | .           | .           | .           | .           | .           | .           | .           | .           |                                | <b>499</b>                      |
| <i>Chaerephon plicatus</i>       | .      | .      | .           | .           | .           | .           | .           | .           | .           | .           | .           | .           | .           |                                | <b>501</b>                      |
| <i>Artibeus jamaicensis</i>      | .      | .      | .           | .           | .           | .           | .           | .           | .           | .           | .           | .           | .           |                                | <b>501</b>                      |
| <i>Pusa hispida</i>              | .      | .      | .           | .           | .           | .           | .           | .           | .           | .           | .           | .           | .           |                                | 501 <sup>a</sup>                |
| <i>Phoca vitulina</i>            | .      | .      | .           | .           | .           | .           | .           | .           | .           | .           | .           | .           | .           | 501 <sup>b</sup>               | 501 <sup>a</sup>                |
| <i>Pagophilus groenlandica</i>   | .      | .      | .           | .           | .           | .           | .           | .           | .           | .           | .           | A           | .           | 498 <sup>b</sup>               | 499 <sup>a</sup>                |
| <i>Erignathus barbatus</i>       | .      | .      | .           | .           | .           | .           | .           | .           | .           | .           | .           | .           | .           |                                | 501 <sup>a</sup>                |
| <i>Hydrurga leptonyx</i>         | .      | .      | .           | .           | L           | .           | .           | .           | .           | .           | .           | .           | .           |                                | 499 <sup>a</sup>                |
| <i>Leptonychotes weddellii</i>   | .      | .      | .           | .           | L           | .           | .           | .           | .           | .           | .           | .           | .           | 495, 496 <sup>c</sup>          | 499 <sup>a</sup>                |
| <i>Mirounga angustirostris</i>   | .      | .      | .           | .           | L           | .           | .           | .           | .           | .           | S           | .           | .           | 483 <sup>d</sup>               | 487 <sup>a</sup>                |
| <i>Odobenus rosmarus</i>         | N      | .      | .           | .           | .           | .           | .           | .           | .           | .           | .           | .           | .           |                                | 499 <sup>a</sup>                |
| <i>Zalophus californianus</i>    | N      | .      | .           | .           | .           | .           | .           | .           | .           | .           | .           | .           | .           | 499 <sup>a</sup>               | 499 <sup>c</sup>                |
| <i>Ursus maritimus</i>           | .      | .      | .           | .           | .           | .           | .           | .           | .           | .           | .           | .           | .           |                                | 501 <sup>a</sup>                |
| <i>Enhydra lutris</i>            | .      | .      | .           | .           | .           | .           | N           | .           | .           | .           | .           | .           | .           |                                | 501 <sup>a</sup>                |
| <i>Canis lupus</i>               | .      | .      | .           | .           | .           | .           | .           | .           | .           | .           | .           | .           | .           | 508 <sup>f</sup>               | 501 <sup>a</sup>                |
| <i>Felis catus</i>               | .      | .      | .           | .           | .           | .           | .           | .           | .           | .           | .           | .           | .           |                                | 501 <sup>a</sup>                |
| <i>Delphinus delphis</i>         | N      | .      | .           | .           | .           | .           | S           | .           | .           | .           | S           | .           | .           | 489 <sup>g</sup>               |                                 |
| <i>Tursiops truncatus</i>        | N      | .      | .           | .           | .           | S           | R           | .           | .           | .           | S           | .           | .           | 488, 489 <sup>g</sup>          |                                 |
| <i>Globicephala melas</i>        | N      | .      | .           | .           | .           | S           | R           | .           | .           | .           | S           | .           | .           | 488 <sup>g</sup>               |                                 |
| <i>Mesoplodon bidens</i>         | N      | .      | .           | .           | .           | P           | S           | .           | .           | .           | S           | A           | .           | 484 <sup>g</sup>               | 485 <sup>a</sup>                |
| <i>Equus caballus</i>            | .      | .      | .           | .           | .           | .           | .           | .           | .           | .           | .           | A           | n/a         |                                | <b>499</b>                      |
| <i>Bos taurus</i>                | .      | .      | .           | .           | .           | P           | H           | .           | .           | .           | .           | A           | .           | 500 <sup>h</sup>               |                                 |

Table S4 continued

| Species                              | 8<br>3 | 9<br>6 | 1<br>0<br>2 | 1<br>2<br>2 | 1<br>8<br>3 | 1<br>9<br>4 | 1<br>9<br>5 | 2<br>5<br>3 | 2<br>6<br>1 | 2<br>8<br>9 | 2<br>9<br>2 | 2<br>9<br>9 | 3<br>1<br>7 | $\lambda_{\max}$<br>(measured) | $\lambda_{\max}$<br>(predicted) |
|--------------------------------------|--------|--------|-------------|-------------|-------------|-------------|-------------|-------------|-------------|-------------|-------------|-------------|-------------|--------------------------------|---------------------------------|
| <i>Sus scrofa</i>                    | .      | .      | .           | .           | L           | .           | .           | .           | .           | .           | .           | .           | .           |                                | <b>499</b>                      |
| <i>Homo sapiens</i>                  | .      | .      | .           | .           | L           | .           | .           | .           | .           | .           | .           | A           | .           | 497 <sup>i</sup>               |                                 |
| <i>Pan troglodytes</i>               | .      | .      | .           | .           | L           | .           | .           | .           | .           | .           | .           | A           | .           |                                | <b>497</b>                      |
| <i>Macaca fascicularis</i>           | .      | .      | .           | .           | L           | .           | .           | .           | .           | .           | .           | .           | .           | 500 <sup>j</sup>               | <b>499</b>                      |
| <i>Macaca mulatta</i>                | .      | .      | .           | .           | L           | .           | .           | .           | .           | .           | .           | .           | .           |                                | <b>499</b>                      |
| <i>Otolemur crassicaudatus</i>       | .      | .      | .           | .           | .           | .           | .           | .           | .           | .           | .           | .           | .           |                                | <b>501</b>                      |
| <i>Loxodonta africana</i>            | N      | .      | .           | .           | .           | .           | .           | .           | .           | .           | .           | A           | .           | 496 <sup>k</sup>               | <b>497</b>                      |
| <i>Trichechus manatus</i>            | .      | .      | .           | .           | .           | .           | .           | .           | .           | .           | .           | .           | .           | 502 <sup>g</sup>               | <b>501</b>                      |
| <i>Macroscelides proboscideus</i>    | .      | .      | .           | .           | .           | .           | .           | .           | .           | .           | .           | .           | .           |                                | <b>501</b>                      |
| <i>Amblysomus hottentotus</i>        | .      | .      | .           | n<br>/a     | .           | .           | .           | .           | .           | .           | .           | .           | .           |                                | <b>501</b>                      |
| <i>Oryctolagus cuniculus</i>         | .      | .      | .           | .           | .           | .           | .           | .           | .           | .           | .           | .           | .           | 502 <sup>f</sup>               | <b>501</b>                      |
| <i>Bathyergus suillus</i>            | .      | .      | .           | .           | .           | P           | .           | .           | .           | .           | .           | .           | .           |                                | <b>498</b>                      |
| <i>Cryptomys damarensis</i>          | N      | .      | .           | .           | .           | P           | .           | .           | .           | .           | .           | .           | .           |                                | <b>496</b>                      |
| <i>Heliophobius argenteocinereus</i> | N      | .      | .           | .           | .           | P           | .           | .           | .           | .           | .           | .           | .           |                                | <b>496</b>                      |
| <i>Heterocephalus glaber</i>         | .      | .      | .           | .           | .           | P           | .           | .           | .           | .           | .           | .           | .           |                                | <b>498</b>                      |
| <i>Cavia porcellus</i>               | N      | .      | .           | .           | .           | .           | .           | .           | .           | .           | .           | .           | .           |                                | <b>499</b>                      |
| <i>Thryonomys swinderianus</i>       | .      | .      | .           | .           | .           | .           | .           | .           | .           | .           | .           | .           | .           |                                | <b>501</b>                      |
| <i>Rattus norvegicus</i>             | .      | .      | .           | .           | .           | .           | .           | .           | .           | .           | .           | .           | .           | 498 <sup>f</sup>               | <b>501</b>                      |
| <i>Mus musculus</i>                  | .      | .      | .           | .           | .           | .           | .           | .           | .           | .           | .           | .           | .           | 498 <sup>f</sup>               | <b>501</b>                      |
| <i>Cricetulus griseus</i>            | .      | .      | .           | .           | .           | .           | .           | .           | .           | .           | .           | .           | .           |                                | <b>501</b>                      |
| <i>Spalax ehrenbergi</i>             | .      | .      | .           | .           | .           | .           | .           | .           | .           | .           | .           | .           | .           |                                | <b>501</b>                      |
| <i>Caluromys philander</i>           | .      | .      | .           | .           | .           | .           | .           | .           | .           | .           | .           | A           | .           |                                | <b>499</b>                      |
| <i>Monodelphis domestica</i>         | .      | .      | .           | .           | .           | .           | .           | .           | .           | .           | .           | .           | .           |                                | <b>501</b>                      |
| <i>Sminthopsis crassicaudata</i>     | .      | V      | .           | .           | .           | .           | N           | .           | .           | .           | .           | .           | .           | 512 <sup>l</sup>               |                                 |
| <i>Ornithorhynchus anatinus</i>      | N      | .      | .           | .           | .           | .           | R           | .           | .           | .           | .           | A           | .           |                                |                                 |

a) Levenson DH, Ponganis PJ, Crognale MA, Deegan JF II, Dizon A et al. (2006) Visual pigments of marine carnivores: pinnipeds, polar bear, and sea otter. *J Comp Physiol A* 192:833-843.

b) Fasick JI, Robinson PR (2000) Spectral-tuning mechanisms of marine mammal rhodopsins and correlations with foraging depth. *Vis Neurosci* 17: 781-788.

c) Lythgoe JN, Dartnall HJA (1970) A "deep sea rhodopsin" in a mammal. *Nature* 227:955-956.

d) Southall KD, Oliver GW, Lewis JW, Le Boeuf BJ, Levenson DH et al. (2002) Visual pigment sensitivity in three deep diving marine mammals. *Mar Mam Sci* 18:275-281.

e) Collins FD, Morton RA (1950). Studies on rhodopsin. I. Methods of extraction and the absorption spectrum. *Biochem J* 47:3-10.

f) Bridges CDB (1959) The visual pigments of some common laboratory mammals. *Nature* 184:1727-1728.

g) Oprian DD, Molday RS, Kaufman RJ, Khorana HG (1987). Expression of a synthetic bovine rhodopsin gene in monkey kidney cells. *Proc Natl Acad Sci USA* 84:8874-8878.

h) Crescitelli F, Dartnall HJ (1953). Human visual purple. *Nature* 172:195-197.

i) Bowmaker JK, Dartnall HJ, Lythgoe JN, Mollon JD (1978). The visual pigments of rods and cones in the rhesus monkey, *Macaca mulatta*. *J Physiol* 274:329-348.

j) Yokoyama S, Takenaka N, Agnew DW, Shoshani J (2005) Elephants and human color-blind deuteranopes have identical sets of visual pigments. *Genetics* 170:335-344.

k) Hunt DM, Arrese CA, von Dornum M, Rodger J, Oddy A et al. (2003) The rod opsin pigments from two marsupial species, the South American bare-tailed woolly opossum and the Australian fat-tailed dunnart. *Gene* 323:157-162.
